# Supplementary material for: The sockeye salmon genome, transcriptome, and analyses identifying population defining regions of the genome
Source: PLoS One. 2020 Oct 29;15(10):e0240935. doi: 10.1371/journal.pone.0240935 (PMC7595290; doi:10.1371/journal.pone.0240935)
Supplement: S1 Table — (XLSX) [file pone.0240935.s009.xlsx]

## Sheet: Sheet2
Original Order	Publication Order	Individual	Ancestry	Group1 (Admixture)	Group2 (Admixture)	Group3 (Admixture)	DAPC3	DAPC3 (published)	LD1 (DAPC x-axis)	LD2 (DAPC y-axis)	Drainage	Ecotype	Body of Water	Latitude (approximate)	Longitude (approximate)	Longitude_360 (approximate)	SDY+ (manual inspection of alignments to SDY gene)	Sex (Phenotype)	NSEG (number of segments) (runs of homozygosity)	KB (total length runs of homozygosity)	Missing (genotypes for first filter variants)	HomRef (genotypes for first filter variants)	Het (genotypes for first filter variants)	HomAlt (genotypes for first filter variants)	AvgDep (first filter variants)	Heterozygosity Ratio (genotypes for first filter variants)	Het/1Kb (genotypes for first filter variants)
96	1	HI.5095.002.IDT_i7_61---IDT_i5_61.Oner_Kronki-Kok_6	Wild	1e-05	1e-05	0.99998	2	3	6.28457	-7.69215	Kronotskaya*	Kokanee	Kronotskoye	54.7722	160.229	160.229	Y	*	45	61710.4	54831	2635330	1167428	675554	12.797	1.7281	0.605787
95	2	HI.5095.002.IDT_i7_49---IDT_i5_49.Oner_Kronki-Kok_52	Wild	1e-05	1e-05	0.99998	2	3	6.27036	-7.5856	Kronotskaya*	Kokanee	Kronotskoye	54.7722	160.229	160.229	Y	*	51	75126.1	46651	2624603	1192643	669246	13.0658	1.78207	0.618872
94	3	HI.5095.002.IDT_i7_37---IDT_i5_37.Oner_Kronki-Kok_12	Wild	1e-05	1e-05	0.99998	2	3	6.28621	-7.52912	Kronotskaya*	Kokanee	Kronotskoye	54.7722	160.229	160.229	Y	*	54	73088.8	62801	2609944	1178385	682013	13.0432	1.7278	0.611473
81	4	HI.4954.005.IDT_i7_99---IDT_i5_99.Oner_Kronki-Kok_28	Wild	1e-05	1e-05	0.99998	2	3	6.4075	-7.55384	Kronotskaya*	Kokanee	Kronotskoye	54.7722	160.229	160.229	Y	*	43	60215.7	28858	2553022	1291417	659846	14.5591	1.95715	0.670126
140	5	HI.5124.005.IDT_i7_168---IDT_i5_168.On2005-Elovka-2	Wild	1e-05	1e-05	0.99998	2	3	6.97579	-7.4637	Kamchatka	Sockeye	Elovka	56.4029	-199.365	160.635	N	*	37	52328.8	36419	2595382	1251189	650153	13.1117	1.92445	0.649252
139	6	HI.5124.005.IDT_i7_156---IDT_i5_156.On2005-Elovka-1	Wild	1e-05	1e-05	0.99998	2	3	6.74301	-7.67366	Kamchatka	Sockeye	Elovka	56.4029	-199.365	160.635	N	*	57	92473.4	45773	2680442	1132547	674381	11.6906	1.67939	0.587687
137	7	HI.5124.003.IDT_i7_34---IDT_i5_34.Oner_Albert-Johnson-Sock_2002-64	Wild	1e-05	1e-05	0.99998	2	3	6.64734	-6.71478	Aniakchak	Sockeye	Albert Johnson	56.7928	-157.76	202.24	Y	M	34	46636.3	47390	2616571	1258356	610826	12.0555	2.06009	0.652971
136	8	HI.5124.003.IDT_i7_22---IDT_i5_22.Oner_Albert-Johnson-Sock_2002-52	Wild	1e-05	1e-05	0.99998	2	3	6.55549	-6.68066	Aniakchak	Sockeye	Albert Johnson	56.7928	-157.76	202.24	N	F	49	80118	66838	2671167	1177280	617858	10.7233	1.90542	0.6109
117	9	HI.5120.003.IDT_i7_85---IDT_i5_85.Oner_Albert-Johnson-Sock_2002-65	Wild	1e-05	1e-05	0.99998	2	3	6.76126	-6.75429	Aniakchak	Sockeye	Albert Johnson	56.7928	-157.76	202.24	Y	M	31	47672.9	50002	2622083	1247253	613805	11.8092	2.032	0.647209
138	10	HI.5124.003.IDT_i7_46---IDT_i5_46.Oner_Albert-Johnson-Sock_2002-45	Wild	1e-05	1e-05	0.99998	2	3	7.01152	-7.00226	Aniakchak	Sockeye	Albert Johnson	56.7928	-157.76	202.24	N	F	40	66975.1	32795	2587838	1303056	609454	13.3892	2.13807	0.676166
69	11	HI.4954.002.IDT_i7_181---IDT_i5_181.Oner_Hanson-Sock_9	Wild	1e-05	1e-05	0.99998	2	3	7.40062	-8.33646	Wood	Sockeye	Hansen	59.3213	-158.701	201.299	Y	*	31	41114.2	38551	2632059	1225794	636739	12.1566	1.92511	0.636074
68	12	HI.4954.002.IDT_i7_169---IDT_i5_169.Oner_Hanson-Sock_8	Wild	1e-05	1e-05	0.99998	2	3	7.47763	-8.13291	Wood	Sockeye	Hansen	59.3213	-158.701	201.299	N	*	29	35206.1	44846	2639327	1211364	637606	11.8167	1.89986	0.628586
67	13	HI.4954.002.IDT_i7_157---IDT_i5_157.Oner_Hanson-Sock_7	Wild	1e-05	0.242191	0.757799	2	3	5.07088	-2.59014	Wood	Sockeye	Hansen	59.3213	-158.701	201.299	N	*	28	47466.9	50632	2624538	1256809	601164	11.2633	2.09063	0.652168
66	14	HI.4954.002.IDT_i7_145---IDT_i5_145.Oner_Hanson-Sock_5	Wild	1e-05	1e-05	0.99998	2	3	7.56118	-8.45983	Wood	Sockeye	Hansen	59.3213	-158.701	201.299	N	*	38	60923.4	26426	2565086	1307329	634302	14.4155	2.06105	0.678383
71	15	HI.4954.003.IDT_i7_122---IDT_i5_122.Oner_Tazimina-Sock_9	Wild	1e-05	1e-05	0.99998	2	3	7.69784	-8.60718	Kvichak	Sockeye	Tazimina	59.9588	-154.836	205.164	Y	*	54	73101.8	44431	2641814	1197647	649251	11.3763	1.84466	0.621468
70	16	HI.4954.003.IDT_i7_110---IDT_i5_110.Oner_Tazimina-Sock_7	Wild	1e-05	1e-05	0.99998	2	3	7.48137	-8.21771	Kvichak	Sockeye	Tazimina	59.9588	-154.836	205.164	N	*	11	15031.3	34777	2553664	1408379	536323	12.49	2.62599	0.730819
73	17	HI.4954.003.IDT_i7_98---IDT_i5_98.Oner_Tazimina-Sock_4	Wild	1e-05	1e-05	0.99998	2	3	7.78864	-8.66588	Kvichak	Sockeye	Tazimina	59.9588	-154.836	205.164	N	*	46	59311.2	25551	2592666	1290481	624445	13.4516	2.0666	0.66964
72	18	HI.4954.003.IDT_i7_134---IDT_i5_134.Oner_Tazimina-Sock_12	Wild	1e-05	1e-05	0.99998	2	3	7.72657	-8.62514	Kvichak	Sockeye	Tazimina	59.9588	-154.836	205.164	Y	*	54	75149.8	24562	2592630	1277681	638270	13.743	2.00179	0.662998
77	19	HI.4954.004.IDT_i7_182---IDT_i5_182.Oner_Woody-Island-Sock_16	Wild	1e-05	1e-05	0.99998	2	3	7.38037	-8.33146	Kvichak	Sockeye	Woody Island	59.7565	-154.255	205.745	Y	*	29	36592.8	30082	2584350	1294801	623910	12.8203	2.0753	0.671882
76	20	HI.4954.004.IDT_i7_170---IDT_i5_170.Oner_Woody-Island-Sock_12	Wild	1e-05	1e-05	0.99998	2	3	7.47638	-8.15298	Kvichak	Sockeye	Woody Island	59.7565	-154.255	205.745	Y	*	19	25206	38011	2598769	1274570	621793	12.2733	2.04983	0.661384
75	21	HI.4954.004.IDT_i7_158---IDT_i5_158.Oner_Woody-Island-Sock_10	Wild	1e-05	1e-05	0.99998	2	3	7.47693	-8.52591	Kvichak	Sockeye	Woody Island	59.7565	-154.255	205.745	Y	*	28	40180.5	36140	2607570	1260534	628899	12.1287	2.00435	0.654101
74	22	HI.4954.004.IDT_i7_146---IDT_i5_146.Oner_Woody-Island-Sock_7	Wild	1e-05	1e-05	0.99998	2	3	7.42591	-8.42265	Kvichak	Sockeye	Woody Island	59.7565	-154.255	205.745	Y	*	25	32448.6	24462	2561916	1328197	618568	13.9751	2.14721	0.689212
65	23	HI.4954.001.IDT_i7_97---IDT_i5_97.Oner_Klukshu-Sock_1	Wild	0.002098	0.246485	0.751417	2	3	4.69205	-2.13838	Alsek	Sockeye	Klukshu	60.2916	-136.999	223.001	N	*	59	106633	133601	2733194	1038017	628331	8.56429	1.65202	0.538635
64	24	HI.4954.001.IDT_i7_133---IDT_i5_133.Oner_Klukshu-Sock_7	Wild	1e-05	1e-05	0.99998	2	3	7.60816	-8.33393	Alsek	Sockeye	Klukshu	60.2916	-136.999	223.001	N	*	37	46541.4	20348	2576113	1308691	627991	14.5116	2.08393	0.67909
63	25	HI.4954.001.IDT_i7_121---IDT_i5_121.Oner_Klukshu-Sock_6	Wild	1e-05	0.25288	0.74711	2	3	5.10924	-2.68363	Alsek	Sockeye	Klukshu	60.2916	-136.999	223.001	N	*	45	75891.6	22595	2533924	1370548	606076	14.8483	2.26135	0.711188
62	26	HI.4954.001.IDT_i7_109---IDT_i5_109.Oner_Klukshu-Sock_5	Wild	1e-05	0.224916	0.775074	2	3	5.16751	-2.70643	Alsek	Sockeye	Klukshu	60.2916	-136.999	223.001	Y	*	31	44586	50644	2629776	1253094	599629	11.0998	2.08978	0.65024
115	27	HI.5120.003.IDT_i7_61---IDT_i5_61.Oner_Babine-Kok_18	Wild	0.048377	0.461131	0.490492	3	2	2.71732	2.88475	Skeena	Kokanee	Babine	55.6977	-127.695	232.305	Y	*	25	35090.6	132494	2732585	1058107	609957	8.72203	1.73472	0.54906
114	28	HI.5120.003.IDT_i7_49---IDT_i5_49.Oner_Babine-Kok_17	Wild	0.031123	0.462896	0.50598	3	2	3.1453	2.60454	Skeena	Kokanee	Babine	55.6977	-127.695	232.305	Y	*	14	23612.7	100458	2693179	1131059	608447	9.50329	1.85893	0.586915
113	29	HI.5120.002.IDT_i7_37---IDT_i5_37.Oner_Babine-Kok_16	Wild	0.029507	0.466937	0.503556	3	2	2.95568	2.80991	Skeena	Kokanee	Babine	55.6977	-127.695	232.305	Y	*	35	44881.1	218134	2757163	937505	620341	7.72238	1.51127	0.486478
111	30	HI.5120.002.IDT_i7_13---IDT_i5_13.Oner_Babine-Sock_14	Wild	0.006806	0.491038	0.502156	3	2	3.20349	3.13455	Skeena	Sockeye	Babine	55.6977	-127.695	232.305	N	*	25	39562	78169	2631668	1235132	588174	10.8455	2.09994	0.640919
110	31	HI.5120.002.IDT_i7_1---IDT_i5_1.Oner_Babine-Sock_13	Wild	1e-05	0.493573	0.506417	3	2	3.0598	3.27601	Skeena	Sockeye	Babine	55.6977	-127.695	232.305	N	*	31	54508	105763	2662204	1156395	608781	10.0027	1.89953	0.600062
93	32	HI.4954.008.IDT_i7_184---IDT_i5_184.Oner_Babine-Sock_12	Wild	0.017119	0.493851	0.48903	3	2	3.17933	3.02124	Skeena	Sockeye	Babine	55.6977	-127.695	232.305	Y	*	19	30643.6	33710	2549182	1374854	575397	12.9494	2.3894	0.713422
92	33	HI.4954.008.IDT_i7_172---IDT_i5_172.Oner_Babine-Sock_11	Wild	0.01452	0.483248	0.502232	3	2	3.21413	2.73211	Skeena	Sockeye	Babine	55.6977	-127.695	232.305	N	*	22	33036.7	38305	2582749	1332421	579668	12.2906	2.29859	0.691403
116	34	HI.5120.003.IDT_i7_73---IDT_i5_73.Oner_Babine-Kok_19	Wild	0.053038	0.444388	0.502574	3	2	3.03742	2.53906	Skeena	Kokanee	Babine	55.6977	-127.695	232.305	Y	*	25	40412.1	39234	2570982	1321382	601545	12.92	2.19665	0.685675
134	35	HI.5124.002.IDT_i7_93---IDT_i5_93.On181115-B	Wild	0.022371	0.537321	0.440308	3	2	3.35022	2.00101	Bella Coola	Sockeye	Snootli	52.3835	-126.548	233.452	Y	M	13	17481.8	38373	2592556	1359571	542643	12.6054	2.50546	0.705492
121	36	HI.5120.004.IDT_i7_38---IDT_i5_38.On181115-C	Wild	0.023391	0.515844	0.460764	3	2	3.14559	2.15451	Bella Coola	Sockeye	Snootli	52.3835	-126.548	233.452	Y	M	8	10851.1	139136	2717472	1126124	550411	8.38526	2.04597	0.584354
120	37	HI.5120.004.IDT_i7_26---IDT_i5_26.On181115-A	Wild	0.011668	0.491221	0.497111	3	2	3.2137	2.92989	Bella Coola	Sockeye	Snootli	52.3835	-126.548	233.452	Y	M	22	28601.3	73147	2640586	1237855	581555	10.4257	2.12853	0.642332
119	38	HI.5120.004.IDT_i7_2---IDT_i5_2.On181115-1	Wild	0.013617	0.496814	0.489569	3	2	3.30918	2.85682	Bella Coola	Sockeye	Snootli	52.3835	-126.548	233.452	Y	F	28	39747.1	45523	2579800	1327642	580178	12.1168	2.28834	0.688924
118	39	HI.5120.004.IDT_i7_14---IDT_i5_14.On181115-3	Wild	0.024437	0.525785	0.449778	3	2	3.26867	1.97442	Bella Coola	Sockeye	Snootli	52.3835	-126.548	233.452	N	F	20	31358.9	43955	2606190	1301588	581410	12.1687	2.23867	0.675404
1	40	HI.4050.001.NS_Adaptor_11.On170113-A3	Wild	0.01104	0.774654	0.214306	3	2	3.14959	4.02087	Fraser	Sockeye	Pitt	49.3151	-122.677	237.323	N	F	186	1427950	16893	2988448	618294	909508	52.4803	0.679812	0.320837
3	41	HI.4050.003.NS_Adaptor_13.On160907-A	Wild	0.064118	0.714293	0.221589	3	2	2.59569	2.86377	Fraser	Sockeye	Pitt	49.3151	-122.677	237.323	Y	M	8	15137.1	6783	2524010	1548804	453546	50.8708	3.41488	0.803686
2	42	HI.4050.002.NS_Adaptor_12.On160907-1	Wild	0.05605	0.701388	0.242561	3	2	2.96915	3.72306	Fraser	Sockeye	Pitt	49.3151	-122.677	237.323	N	F	13	21214.1	3053	3012589	1515254	2247	55.2113	674.345	0.786277
33	43	HI.4577.006.NS_Adaptor_22.On160907-3	Wild	0.045094	0.715888	0.239018	3	2	2.82677	2.97938	Fraser	Sockeye	Pitt	49.3151	-122.677	237.323	N	F	11	32332.1	17487	2635346	1426912	453398	13.8354	3.14715	0.740436
35	44	HI.4577.006.NS_Adaptor_24.On160907-5	Wild	0.031347	0.743676	0.224977	3	2	2.97045	3.52167	Fraser	Sockeye	Pitt	49.3151	-122.677	237.323	N	F	17	24170.2	15481	2618230	1450873	448559	14.5121	3.23452	0.752869
34	45	HI.4577.006.NS_Adaptor_23.On160907-4	Wild	0.053539	0.696876	0.249585	3	2	2.68795	2.85125	Fraser	Sockeye	Pitt	49.3151	-122.677	237.323	N	F	12	22474.2	25456	2671349	1375332	461006	12.3312	2.98333	0.71367
32	46	HI.4577.006.NS_Adaptor_21.On160907-2	Wild	0.064443	0.710609	0.224948	3	2	2.57899	2.8032	Fraser	Sockeye	Pitt	49.3151	-122.677	237.323	N	F	4	6375.02	14037	2606346	1468907	443853	15.2597	3.30944	0.762227
15	47	HI.4573.001.NS_Adaptor_19.On171220-4	Wild	1e-05	0.975643	0.024347	3	2	2.91854	3.56473	Fraser	Sockeye	Cultus	49.0752	-121.982	238.018	N	F	106	161960	26373	2653430	1206628	646712	13.0988	1.86579	0.626128
14	48	HI.4573.001.NS_Adaptor_18.On171220-2	Wild	1e-05	0.963875	0.036115	3	2	3.01352	3.37524	Fraser	Sockeye	Cultus	49.0752	-121.982	238.018	N	F	110	174340	19152	2631432	1232881	649678	14.6316	1.89768	0.639751
13	49	HI.4573.001.NS_Adaptor_17.On171220-1	Wild	1e-05	0.966394	0.033596	3	2	2.88128	3.53271	Fraser	Sockeye	Cultus	49.0752	-121.982	238.018	N	F	116	219264	29308	2694634	1152427	656774	12.2562	1.75468	0.598003
18	50	HI.4573.002.NS_Adaptor_22.On171220-D	Wild	1e-05	0.969306	0.030684	3	2	2.97605	3.42726	Fraser	Sockeye	Cultus	49.0752	-121.982	238.018	Y	M	92	152877	18175	2625304	1248927	640737	14.6864	1.9492	0.648078
17	51	HI.4573.002.NS_Adaptor_21.On171220-B	Wild	1e-05	0.96969	0.0303	3	2	2.87526	3.47615	Fraser	Sockeye	Cultus	49.0752	-121.982	238.018	Y	M	105	160553	18395	2607570	1274871	632307	14.9499	2.01622	0.66154
16	52	HI.4573.001.NS_Adaptor_20.On171220-A	Wild	1e-05	0.971594	0.028396	3	2	2.93114	3.53814	Fraser	Sockeye	Cultus	49.0752	-121.982	238.018	Y	M	118	227847	17648	2613292	1260732	641471	15.4254	1.96538	0.654203
88	53	HI.4954.007.IDT_i7_124---IDT_i5_124.Oner_Talka-Kok_1	Wild	0.136451	0.848988	0.014561	3	2	2.88624	3.70047	Fraser	Kokanee	Takla	55.7039	-126.248	233.752	N	*	23	33230.5	28395	2534874	1348903	620971	14.2455	2.17225	0.699956
87	54	HI.4954.007.IDT_i7_112---IDT_i5_112.Oner_Talka-Sock_7	Wild	1e-05	0.99998	1e-05	3	2	3.44088	3.65358	Fraser	Sockeye	Takla	55.7039	-126.248	233.752	Y	*	15	26214	46158	2597753	1314073	575159	11.5267	2.28471	0.681883
86	55	HI.4954.007.IDT_i7_100---IDT_i5_100.Oner_Talka-Sock_5	Wild	1e-05	0.99998	1e-05	3	2	3.44306	3.77555	Fraser	Sockeye	Takla	55.7039	-126.248	233.752	N	*	31	53337.4	43212	2575197	1329457	585277	12.0421	2.2715	0.689865
85	56	HI.4954.006.IDT_i7_183---IDT_i5_183.Oner_Talka-Sock_4	Wild	1e-05	0.99998	1e-05	3	2	3.45288	3.80713	Fraser	Sockeye	Takla	55.7039	-126.248	233.752	Y	*	21	42246.4	33052	2563964	1366009	570118	12.7432	2.39601	0.708832
84	57	HI.4954.006.IDT_i7_171---IDT_i5_171.Oner_Talka-Sock_2	Wild	1e-05	0.99998	1e-05	3	2	3.34216	3.88907	Fraser	Sockeye	Takla	55.7039	-126.248	233.752	Y	*	13	22231.5	28646	2548333	1382139	574025	13.668	2.4078	0.717202
91	58	HI.4954.008.IDT_i7_160---IDT_i5_160.Oner_Talka-Kok_8	Wild	0.080232	0.902774	0.016994	3	2	3.3291	3.69837	Fraser	Kokanee	Takla	55.7039	-126.248	233.752	N	*	16	22374.8	33585	2546960	1359426	593172	12.7425	2.29179	0.705417
90	59	HI.4954.008.IDT_i7_148---IDT_i5_148.Oner_Talka-Kok_5	Wild	0.109166	0.87964	0.011194	3	2	3.16664	3.74661	Fraser	Kokanee	Takla	55.7039	-126.248	233.752	Y	*	15	23251	48135	2606656	1264577	613775	11.3583	2.06033	0.656199
89	60	HI.4954.007.IDT_i7_136---IDT_i5_136.Oner_Talka-Kok_4	Wild	0.098953	0.896589	0.004458	3	2	3.29632	3.74609	Fraser	Kokanee	Takla	55.7039	-126.248	233.752	N	*	15	22458.8	48267	2591605	1281748	611523	11.697	2.09599	0.665109
40	61	HI.4578.005.NS_Adaptor_9.On170923-iii	Wild	1e-05	0.99998	1e-05	3	2	3.07847	3.70058	Fraser	Sockeye	Tachie	54.6602	-124.772	235.228	N	F	12	17307.9	13065	2497170	1479970	542938	16.1329	2.72585	0.767968
39	62	HI.4578.005.NS_Adaptor_11.On170923-v	Wild	1e-05	0.99998	1e-05	3	2	3.14802	3.71267	Fraser	Sockeye	Tachie	54.6602	-124.772	235.228	N	F	14	21933.6	23833	2560702	1398066	550542	12.6833	2.53944	0.725467
38	63	HI.4578.005.NS_Adaptor_10.On170923-iv	Wild	1e-05	0.99998	1e-05	3	2	3.17298	3.71771	Fraser	Sockeye	Tachie	54.6602	-124.772	235.228	N	F	17	31237.9	19812	2545148	1410354	557829	13.5831	2.52829	0.731843
37	64	HI.4578.004.NS_Adaptor_8.On170923-ii	Wild	1e-05	0.99998	1e-05	3	2	3.11748	3.82341	Fraser	Sockeye	Tachie	54.6602	-124.772	235.228	N	F	11	17865.4	16765	2524209	1443609	548560	14.433	2.63163	0.7491
36	65	HI.4578.004.NS_Adaptor_7.On170923-i	Wild	1e-05	0.999979	1.1e-05	3	2	3.27272	3.73924	Fraser	Sockeye	Tachie	54.6602	-124.772	235.228	N	F	16	27480.3	17053	2526267	1431016	558807	14.254	2.56084	0.742565
101	66	HI.5095.003.IDT_i7_85---IDT_i5_85.Oner_Shale-Kok_3	Wild	0.045538	0.952417	0.002045	3	2	3.04677	3.66758	Skeena	Kokanee	Shale	54.7367	-126.014	233.986	Y	*	7	9156.23	53416	2561754	1368977	548996	12.3775	2.4936	0.710373
135	67	HI.5124.003.IDT_i7_10---IDT_i5_10.Oner_Shale-Kok_6	Wild	0.122213	0.874794	0.002993	3	2	2.98944	3.8201	Skeena	Kokanee	Shale	54.7367	-126.014	233.986	N	*	23	31312.4	107938	2690028	1103381	631796	9.41751	1.74642	0.572553
112	68	HI.5120.002.IDT_i7_25---IDT_i5_25.Oner_Shale-Kok_4	Wild	0.117706	0.875108	0.007186	3	2	2.94424	3.76223	Skeena	Kokanee	Shale	54.7367	-126.014	233.986	N	*	28	37040.9	154071	2728381	1014623	636068	8.48281	1.59515	0.526496
97	69	HI.5095.002.IDT_i7_73---IDT_i5_73.Oner_Shale-Kok_2	Wild	0.119362	0.866754	0.013884	3	2	3.03964	3.79954	Skeena	Kokanee	Shale	54.7367	-126.014	233.986	N	*	31	42033.4	58533	2597735	1244999	631876	12.3493	1.97032	0.646039
12	70	HI.4566.006.NS_Adaptor_2.On170919-4335	Wild	1e-05	0.99998	1e-05	3	2	2.67358	3.5633	Fraser	Sockeye	Upper Horsefly	52.4015	-120.68	239.32	N	*	23	48999.4	29180	2582266	1360231	561466	12.0772	2.42264	0.705834
11	71	HI.4566.006.NS_Adaptor_1.On170919-4334	Wild	1e-05	0.99998	1e-05	3	2	2.84411	3.57906	Fraser	Sockeye	Upper Horsefly	52.4015	-120.68	239.32	Y	*	23	46499.4	14437	2495336	1475798	547572	15.9636	2.69517	0.765803
10	72	HI.4566.005.NS_Adaptor_24.On170919-4333	Wild	1e-05	0.99998	1e-05	3	2	2.7276	3.4171	Fraser	Sockeye	Upper Horsefly	52.4015	-120.68	239.32	Y	*	25	52360.7	25478	2569154	1372629	565882	12.8686	2.42565	0.712268
9	73	HI.4566.005.NS_Adaptor_23.On170919-4332	Wild	1e-05	0.99998	1e-05	3	2	2.87779	3.36503	Fraser	Sockeye	Upper Horsefly	52.4015	-120.68	239.32	N	*	23	46201.7	32921	2600393	1336568	563261	11.8228	2.37291	0.693555
8	74	HI.4566.005.NS_Adaptor_22.On170919-4331	Wild	1e-05	0.99998	1e-05	3	2	2.91141	3.46008	Fraser	Sockeye	Upper Horsefly	52.4015	-120.68	239.32	Y	*	24	41576.5	18241	2541815	1429548	543539	14.4187	2.63007	0.741803
100	75	HI.5095.003.IDT_i7_26---IDT_i5_26.Oner_Little-Horsefly-Kok_19	Wild	0.159037	0.80177	0.039193	3	2	2.08061	2.77271	Fraser	Kokanee	Little Horsefly	52.3732	-121.333	238.667	N	*	34	41206.7	64752	2626762	1210472	631157	11.8984	1.91786	0.628123
83	76	HI.4954.006.IDT_i7_159---IDT_i5_159.Oner_Little-Horsefly-Kok_5	Wild	0.157366	0.812428	0.030206	3	2	2.20685	2.85272	Fraser	Kokanee	Little Horsefly	52.3732	-121.333	238.667	Y	*	49	64994.6	30892	2575787	1311744	614720	13.1257	2.13389	0.680674
82	77	HI.4954.006.IDT_i7_147---IDT_i5_147.Oner_Little-Horsefly-Kok_4	Wild	0.164474	0.794712	0.040814	3	2	2.03487	2.71448	Fraser	Kokanee	Little Horsefly	52.3732	-121.333	238.667	Y	*	11	14118.9	30174	2529338	1421075	552556	13.3595	2.57182	0.737407
80	78	HI.4954.005.IDT_i7_135---IDT_i5_135.Oner_Little-Horsefly-Kok_3	Wild	0.160326	0.814402	0.025273	3	2	2.03657	2.82718	Fraser	Kokanee	Little Horsefly	52.3732	-121.333	238.667	N	*	45	66251	59608	2652921	1181088	639526	10.7181	1.84682	0.612876
5	79	HI.4050.005.NS_Adaptor_15.On160928-H2050	Wild	1e-05	0.99998	1e-05	3	2	2.88904	3.5122	Fraser	Sockeye	Chilko	51.6219	-124.143	235.857	N	F	11	26373	6924	2426563	1547366	552290	52.3708	2.80173	0.80294
4	80	HI.4050.004.NS_Adaptor_14.On160928-H2049	Wild	1e-05	0.99998	1e-05	3	2	2.87276	3.28186	Fraser	Sockeye	Chilko	51.6219	-124.143	235.857	N	F	13	20805	6788	2443583	1532397	550375	54.3096	2.78428	0.795172
31	81	HI.4577.005.NS_Adaptor_20.On160928-H2068	Wild	1e-05	0.99998	1e-05	3	2	2.93319	3.49207	Fraser	Sockeye	Chilko	51.6219	-124.143	235.857	Y	M	21	30330.6	10711	2468627	1500579	553226	17.5843	2.71242	0.778662
30	82	HI.4577.005.NS_Adaptor_19.On160928-H2060	Wild	1e-05	0.99998	1e-05	3	2	2.84992	3.46147	Fraser	Sockeye	Chilko	51.6219	-124.143	235.857	Y	M	16	21708.2	23498	2549027	1406371	554247	12.6657	2.53744	0.729777
28	83	HI.4577.005.NS_Adaptor_17.On160928-H2066	Wild	1e-05	0.99998	1e-05	3	2	2.8313	3.38098	Fraser	Sockeye	Chilko	51.6219	-124.143	235.857	N	F	11	15935.8	20326	2541707	1414466	556644	13.3205	2.54106	0.733977
27	84	HI.4577.004.NS_Adaptor_16.On160928-H2054	Wild	1e-05	0.99998	1e-05	3	2	2.84036	3.40896	Fraser	Sockeye	Chilko	51.6219	-124.143	235.857	N	F	13	17905	29188	2592437	1339286	572232	11.6744	2.34046	0.694966
26	85	HI.4577.004.NS_Adaptor_15.On160928-H2053	Wild	1e-05	0.99998	1e-05	3	2	2.88032	3.29411	Fraser	Sockeye	Chilko	51.6219	-124.143	235.857	N	F	15	22655.4	16275	2512255	1457983	546630	15.2702	2.66722	0.756559
29	86	HI.4577.005.NS_Adaptor_18.On160928-H2056	Wild	1e-05	0.99998	1e-05	3	2	2.94665	3.39095	Fraser	Sockeye	Chilko	51.6219	-124.143	235.857	Y	M	13	19546.4	20766	2527671	1425329	559377	13.4745	2.54807	0.739614
6	87	HI.4050.006.NS_Adaptor_16.On160928-H2051	Wild	1e-05	0.99998	1e-05	3	2	2.79529	3.4503	Fraser	Sockeye	Chilko	51.6219	-124.143	235.857	Y	M	17	35824.1	6738	2441425	1531505	553475	48.0952	2.76707	0.79471
7	88	HI.4050.007.NS_Adaptor_17.On160928-H2052	Wild	1e-05	0.99998	1e-05	3	2	3.06707	3.35524	Fraser	Sockeye	Chilko	51.6219	-124.143	235.857	Y	M	13	21176.9	6985	2438860	1531682	555616	44.5723	2.75673	0.794801
46	89	HI.4578.007.NS_Adaptor_20.On171018-5	Wild	0.016187	0.96933	0.014483	3	2	2.30629	3.44541	Fraser	Sockeye	Adams	50.8934	-119.552	240.448	N	F	10	13633.7	19139	2470174	1590731	453099	13.8612	3.51078	0.825442
45	90	HI.4578.007.NS_Adaptor_19.On171018-3	Wild	0.029105	0.950237	0.020657	3	2	2.28309	3.28345	Fraser	Sockeye	Adams	50.8934	-119.552	240.448	N	F	13	15835.9	18674	2524137	1449745	540587	13.858	2.6818	0.752284
44	91	HI.4578.007.NS_Adaptor_18.On171018-1	Wild	0.033917	0.939771	0.026313	3	2	2.15814	3.26737	Fraser	Sockeye	Adams	50.8934	-119.552	240.448	N	F	13	28091.1	17980	2525485	1442208	547470	14.1255	2.63431	0.748373
41	92	HI.4578.006.NS_Adaptor_15.On171018-B	Wild	0.034658	0.955009	0.010333	3	2	2.13556	3.43411	Fraser	Sockeye	Adams	50.8934	-119.552	240.448	Y	M	6	7865.04	22019	2548556	1420218	542350	13.519	2.61864	0.736962
43	93	HI.4578.007.NS_Adaptor_17.On171018-E	Wild	0.016261	0.957245	0.026495	3	2	2.43012	3.41715	Fraser	Sockeye	Adams	50.8934	-119.552	240.448	Y	M	8	11125.5	18011	2518159	1465562	531411	13.8553	2.75787	0.760491
42	94	HI.4578.006.NS_Adaptor_16.On171018-D	Wild	0.022136	0.95667	0.021194	3	2	2.50719	3.1003	Fraser	Sockeye	Adams	50.8934	-119.552	240.448	Y	M	13	18586.4	26870	2572839	1382002	551432	12.6267	2.50621	0.717131
79	95	HI.4954.005.IDT_i7_123---IDT_i5_123.Oner_Okanagan-Sock_4	Wild	0.114907	0.817369	0.067725	3	2	1.49549	3.11347	Columbia	Sockeye	Okanagan	49.5149	-119.6	240.4	N	*	34	47444.5	43142	2582440	1329321	578240	11.9916	2.29891	0.689795
78	96	HI.4954.005.IDT_i7_111---IDT_i5_111.Oner_Okanagan-Sock_1	Wild	0.139064	0.794685	0.066251	3	2	1.24763	3.01459	Columbia	Sockeye	Okanagan	49.5149	-119.6	240.4	Y	*	31	44821.8	39284	2585235	1332366	576258	12.0098	2.3121	0.691375
99	97	HI.5095.003.IDT_i7_2---IDT_i5_2.Oner_Okanagan-Sock_3	Wild	0.122822	0.806707	0.070471	3	2	1.3663	3.00479	Columbia	Sockeye	Okanagan	49.5149	-119.6	240.4	Y	*	39	66753.6	53625	2580014	1322268	577236	12.7614	2.29069	0.686135
98	98	HI.5095.003.IDT_i7_14---IDT_i5_14.Oner_Okanagan-Sock_9	Wild	0.119727	0.805026	0.075247	3	2	1.49978	3.06029	Columbia	Sockeye	Okanagan	49.5149	-119.6	240.4	N	*	29	46496.5	68120	2629289	1246150	589584	11.5758	2.11361	0.646637
24	99	HI.4577.004.NS_Adaptor_13.On171010-12-5a	Wild	0.229331	0.620317	0.150352	3	2	0.485382	2.11038	Columbia	Kokanee	Kootenay	49.5519	-116.821	243.179	N	*	14	17822.1	16913	2534474	1407942	573814	15.1443	2.45366	0.730592
25	100	HI.4577.004.NS_Adaptor_14.On171010-12-4a	Wild	0.251695	0.609015	0.13929	3	2	0.224727	2.01306	Columbia	Kokanee	Kootenay	49.5519	-116.821	243.179	Y	*	22	26452.9	16637	2524474	1399276	592756	15.5811	2.36063	0.726095
23	101	HI.4577.003.NS_Adaptor_12.On171010-12-3a	Wild	0.228484	0.633834	0.137683	3	2	0.474223	2.14022	Columbia	Kokanee	Kootenay	49.5519	-116.821	243.179	Y	*	12	15396.8	21529	2561435	1359779	590400	13.8181	2.30315	0.7056
105	102	HI.5119.007.IDT_i7_92---IDT_i5_92.KO_Norbury_2018-8	Wild/Feral	0.656131	0.299455	0.044414	1	1	-5.20603	0.22198	Columbia	Kokanee	Norbury	49.4705	-115.471	244.529	N	M	25	52457.2	138967	2721929	1069948	602299	8.40211	1.77644	0.555204
109	103	HI.5119.008.IDT_i7_9---IDT_i5_9.KO_Norbury_2018-9	Wild/Feral	0.729865	0.227453	0.042682	1	1	-6.38341	-0.233664	Columbia	Kokanee	Norbury	49.4705	-115.471	244.529	N	M	25	44216.7	46702	2565024	1335108	586309	12.3635	2.27714	0.692798
107	104	HI.5119.008.IDT_i7_33---IDT_i5_33.KO_Norbury_2018-19	Wild/Feral	0.73653	0.237641	0.025829	1	1	-6.23554	-0.132754	Columbia	Kokanee	Norbury	49.4705	-115.471	244.529	N	F	19	37136.6	122079	2706238	1094708	610118	8.85716	1.79426	0.568052
106	105	HI.5119.008.IDT_i7_21---IDT_i5_21.KO_Norbury_2018-18	Wild/Feral	0.743644	0.227533	0.028823	1	1	-6.73123	-0.218936	Columbia	Kokanee	Norbury	49.4705	-115.471	244.529	N	F	17	23880.4	54211	2575345	1306547	597040	11.7977	2.18837	0.677977
129	106	HI.5120.006.IDT_i7_86---IDT_i5_86.KO_Hill_Creek_2018-13	Wild/Feral	0.929276	0.070714	1e-05	1	1	-8.9105	-1.14214	Columbia	Kokanee	Hill	50.6774	-117.814	242.186	N	M	29	40270.2	27349	2542938	1346617	616239	13.9805	2.18522	0.69877
128	107	HI.5120.006.IDT_i7_74---IDT_i5_74.KO_Hill_Creek_2018-11	Wild/Feral	0.918951	0.081039	1e-05	1	1	-8.72579	-1.17732	Columbia	Kokanee	Hill	50.6774	-117.814	242.186	N	M	33	47056.9	37500	2582199	1271302	642142	12.6367	1.97978	0.659688
127	108	HI.5120.006.IDT_i7_62---IDT_i5_62.KO_Hill_Creek_2018-3	Wild/Feral	0.943366	0.049161	0.007473	1	1	-9.248	-1.3517	Columbia	Kokanee	Hill	50.6774	-117.814	242.186	N	F	22	29862.7	21296	2491548	1400306	619993	15.9392	2.25858	0.726629
126	109	HI.5120.005.IDT_i7_50---IDT_i5_50.KO_Hill_Creek_2018-2	Wild/Feral	0.964827	0.035163	1e-05	1	1	-8.6231	-1.1204	Columbia	Kokanee	Hill	50.6774	-117.814	242.186	N	F	38	51384.3	149860	2728891	1015835	638557	8.43046	1.59083	0.527125
133	110	HI.5124.002.IDT_i7_81---IDT_i5_81.KO_Whatshan_2018-22	Wild/Feral	0.99998	1e-05	1e-05	1	1	-10.2856	-1.74422	Columbia	Kokanee	Whatshan	50.0937	-118.097	241.903	N	M	24	32652.1	49026	2594786	1274423	614908	11.4977	2.07254	0.661308
132	111	HI.5124.002.IDT_i7_69---IDT_i5_69.KO_Whatshan_2018-21	Wild/Feral	0.99998	1e-05	1e-05	1	1	-9.80948	-1.65756	Columbia	Kokanee	Whatshan	50.0937	-118.097	241.903	N	M	22	28769.8	104179	2701496	1085410	642058	9.12766	1.69052	0.563228
131	112	HI.5124.002.IDT_i7_57---IDT_i5_57.KO_Whatshan_2018-12	Wild/Feral	0.999979	1e-05	1.1e-05	1	1	-10.1615	-1.5909	Columbia	Kokanee	Whatshan	50.0937	-118.097	241.903	N	F	21	36102.2	56420	2620990	1221084	634649	11.0416	1.92403	0.63363
108	113	HI.5119.008.IDT_i7_45---IDT_i5_45.KO_Whatshan_2018-11	Wild/Feral	0.99998	1e-05	1e-05	1	1	-9.80948	-1.6448	Columbia	Kokanee	Whatshan	50.0937	-118.097	241.903	N	F	36	49962	159268	2740418	996854	636603	8.29427	1.5659	0.517275
52	114	HI.4587.003.NS_Adaptor_19.On130901-5_Meadow.Creek	Wild	0.99998	1e-05	1e-05	1	1	-10.7031	-1.81747	Columbia	Kokanee	Meadow	50.2541	-116.994	243.006	*	F	26	35594.9	16704	2509634	1400640	606165	14.7702	2.31066	0.726803
51	115	HI.4587.003.NS_Adaptor_18.On130901-3	Wild	0.99998	1e-05	1e-05	1	1	-10.6481	-1.90771	Columbia	Kokanee	Meadow	50.2541	-116.994	243.006	N	F	20	28776.4	16642	2512819	1399334	604348	14.8084	2.31544	0.726125
50	116	HI.4587.003.NS_Adaptor_17.On130901-2_Meadow.Creek	Wild	0.99998	1e-05	1e-05	1	1	-10.3436	-1.82452	Columbia	Kokanee	Meadow	50.2541	-116.994	243.006	*	F	28	35331.6	16902	2529902	1378443	607896	14.1402	2.26756	0.715285
49	117	HI.4587.002.NS_Adaptor_16.On130901-E	Wild	0.99998	1e-05	1e-05	1	1	-10.0044	-1.63446	Columbia	Kokanee	Meadow	50.2541	-116.994	243.006	N	M	22	30536.6	75516	2655776	1190405	611446	9.4345	1.94687	0.61771
48	118	HI.4587.002.NS_Adaptor_15.On130901-C	Wild	0.99998	1e-05	1e-05	1	1	-10.3977	-1.71287	Columbia	Kokanee	Meadow	50.2541	-116.994	243.006	N	M	17	22256.2	30190	2557280	1348057	597616	12.1264	2.25572	0.699517
60	119	HI.4587.005.NS_Adaptor_3.On130901-8	Captive Broodstock	0.99998	1e-05	1e-05	1	1	-10.5079	-1.73602	Columbia	Kokanee	Meadow	50.2541	-116.994	243.006	N	MT treated for sex reversal	29	37648.8	19282	2522714	1379784	611363	14.0418	2.2569	0.71598
47	120	HI.4587.002.NS_Adaptor_14.On130901-A	Wild	0.99998	1e-05	1e-05	1	1	-10.6173	-1.80591	Columbia	Kokanee	Meadow	50.2541	-116.994	243.006	N	M	28	41270.9	18059	2523516	1376445	615123	14.1759	2.23767	0.714248
104	121	HI.5119.007.IDT_i7_80---IDT_i5_80.KO_Meadow_Creek_2018-204	Wild/Feral	0.99998	1e-05	1e-05	1	1	-9.5887	-1.53463	Columbia	Kokanee	Meadow	50.2541	-116.994	243.006	N	M	46	57142.5	197418	2749678	940712	645335	7.49159	1.45771	0.488143
103	122	HI.5119.007.IDT_i7_68---IDT_i5_68.KO_Meadow_Creek_2018-203	Wild/Feral	0.99998	1e-05	1e-05	1	1	-10.3479	-1.75642	Columbia	Kokanee	Meadow	50.2541	-116.994	243.006	N	F	18	23538.9	13579	2428393	1515562	575609	19.7959	2.63297	0.786437
102	123	HI.5119.007.IDT_i7_56---IDT_i5_56.KO_Meadow_Creek_2018-202	Wild/Feral	0.99998	1e-05	1e-05	1	1	-8.91844	-1.37701	Columbia	Kokanee	Meadow	50.2541	-116.994	243.006	N	F	51	65842.6	311447	2791565	796668	633463	6.49345	1.25764	0.413397
130	124	HI.5121.008.IDT_i7_44---IDT_i5_44.KO_Meadow_Creek_2018-201	Wild/Feral	0.99998	1e-05	1e-05	1	1	-10.0827	-1.56886	Columbia	Kokanee	Meadow	50.2541	-116.994	243.006	N	M	27	34847.7	104693	2686911	1094695	646844	9.81661	1.69236	0.568046
61	125	HI.4587.005.NS_Adaptor_4.On130901-13	Captive Broodstock	0.99998	1e-05	1e-05	1	1	-10.4158	-1.78844	Columbia	Kokanee	Meadow	50.2541	-116.994	243.006	N	MT treated for sex reversal	26	32866.3	32316	2571974	1320096	608757	12.2285	2.16851	0.685008
59	126	HI.4587.005.NS_Adaptor_2.On130901-5.Brood.2012.XX.Male	Captive Broodstock	0.99998	1e-05	1e-05	1	1	-10.4722	-1.74899	Columbia	Kokanee	Meadow	50.2541	-116.994	243.006	*	MT treated for sex reversal	20	24966.9	27080	2549234	1344585	612244	12.7184	2.19616	0.697715
58	127	HI.4587.005.NS_Adaptor_1.On130901-2.Brood.2012.XX.Male	Captive Broodstock	0.99998	1e-05	1e-05	1	1	-10.4817	-1.84453	Columbia	Kokanee	Meadow	50.2541	-116.994	243.006	*	MT treated for sex reversal	25	31486.8	11795	2474708	1441458	605182	17.5232	2.38186	0.747984
22	128	HI.4577.002.NS_Adaptor_6.On171010-T108	Unknown	0.99998	1e-05	1e-05	1	1	-10.425	-1.91562	Columbia	Kokanee	Kootenay	49.5519	-116.821	243.179	N	F	19	26815.3	20866	2549294	1343444	619539	13.4379	2.16846	0.697123
21	129	HI.4577.002.NS_Adaptor_5.On171010-T093	Unknown	0.99998	1e-05	1e-05	1	1	-10.1841	-1.59657	Columbia	Kokanee	Kootenay	49.5519	-116.821	243.179	N	F	23	32459.2	34385	2599286	1281366	618106	11.3075	2.07305	0.664911
20	130	HI.4577.001.NS_Adaptor_4.On171010-T078	Unknown	0.99998	1e-05	1e-05	1	1	-10.4826	-1.7316	Columbia	Kokanee	Kootenay	49.5519	-116.821	243.179	N	F	26	36957.3	23797	2549355	1340637	619354	13.1162	2.16457	0.695667
19	131	HI.4577.001.NS_Adaptor_3.On171010-T072	Unknown	0.99998	1e-05	1e-05	1	1	-10.5523	-1.80321	Columbia	Kokanee	Kootenay	49.5519	-116.821	243.179	N	F	24	32903.6	15252	2515845	1386908	615138	15.1452	2.25463	0.719677
122	132	HI.5120.005.IDT_i7_15---IDT_i5_15.KO_Columbia_2018-6	Wild/Feral	0.99998	1e-05	1e-05	1	1	-8.91426	-1.28567	Columbia	Kokanee	Columbia	50.2959	-115.865	244.135	N	F	42	54589.1	319716	2789441	798798	625188	6.48157	1.27769	0.414502
125	133	HI.5120.005.IDT_i7_39---IDT_i5_39.KO_Columbia_2018-15	Wild/Feral	0.99998	1e-05	1e-05	1	1	-9.31527	-1.32065	Columbia	Kokanee	Columbia	50.2959	-115.865	244.135	N	M	36	53318.8	193048	2764219	950445	625431	7.68006	1.51966	0.493193
124	134	HI.5120.005.IDT_i7_3---IDT_i5_3.KO_Columbia_2018-4	Wild/Feral	0.99998	1e-05	1e-05	1	1	-9.78498	-1.52559	Columbia	Kokanee	Columbia	50.2959	-115.865	244.135	N	F	32	40032.6	94519	2667037	1143218	628369	9.74361	1.81934	0.593225
123	135	HI.5120.005.IDT_i7_27---IDT_i5_27.KO_Columbia_2018-14	Wild/Feral	0.99998	1e-05	1e-05	1	1	-10.139	-1.67378	Columbia	Kokanee	Columbia	50.2959	-115.865	244.135	N	M	22	31072.2	53273	2590249	1267614	622007	11.9636	2.03794	0.657775
57	136	HI.4587.004.NS_Adaptor_24.On131009-25	Captive Broodstock	0.99998	1e-05	1e-05	1	1	-11.624	-2.22837	Columbia	Kokanee	Clearwater Trout Hatchery	51.6464	-120.063	239.937	N	MT treated for sex reversal	25	48178.2	12705	2482750	1422818	614870	15.9499	2.31401	0.738311
56	137	HI.4587.004.NS_Adaptor_23.On131009-22	Captive Broodstock	0.99998	1e-05	1e-05	1	1	-11.6653	-2.27127	Columbia	Kokanee	Clearwater Trout Hatchery	51.6464	-120.063	239.937	N	MT treated for sex reversal	28	37785	34445	2587408	1296118	615172	11.3418	2.10692	0.672566
55	138	HI.4587.004.NS_Adaptor_22.On131009-17	Captive Broodstock	0.99998	1e-05	1e-05	1	1	-11.6952	-2.30769	Columbia	Kokanee	Clearwater Trout Hatchery	51.6464	-120.063	239.937	N	MT treated for sex reversal	22	30119	18228	2511122	1392215	611578	14.0922	2.27643	0.722431
54	139	HI.4587.004.NS_Adaptor_21.On131009-14	Captive Broodstock	0.99998	1e-05	1e-05	1	1	-11.7552	-2.30075	Columbia	Kokanee	Clearwater Trout Hatchery	51.6464	-120.063	239.937	N	MT treated for sex reversal	18	23252.8	12041	2465026	1450656	605420	16.8454	2.39612	0.752756
53	140	HI.4587.003.NS_Adaptor_20.On131009-8	Captive Broodstock	0.99998	1e-05	1e-05	1	1	-10.5424	-1.94883	Columbia	Kokanee	Clearwater Trout Hatchery	51.6464	-120.063	239.937	N	MT treated for sex reversal	23	29648.6	15233	2492663	1421532	603715	15.6118	2.35464	0.737644
